# Supplementary material for: SARS-CoV-2 variants with mutations at the S1/S2 cleavage site are generated in vitro during propagation in TMPRSS2-deficient cells
Source: PubMed Central journal article supplement (PMC7853460; doi:10.1371/journal.ppat.1009233), 2021-01-21
Supplement: ppat.1009233.s001.pdf [file ppat.1009233.s001.pdf]

**S1 Table. Mutations identified in the genome of the S gene mutants**

| Region              | Gene     | Variant type             | Reference*                            | Allele   | del1        | del2        | del3        | R685H       |
|---------------------|----------|--------------------------|---------------------------------------|----------|-------------|-------------|-------------|-------------|
| 2482                | ORF1a    | Synonymous SNV           | C                                     | T        | 74.9        |             |             |             |
| 3547                | ORF1a    | Synonymous SNV           | A                                     | G        | 77.0        |             |             |             |
| 4548                | ORF1a    | Nonsynonymous SNV        | C                                     | T        |             | 91.8        |             |             |
| 8183                | ORF1a    | Nonsynonymous SNV        | T                                     | C        | 77.4        |             |             |             |
| 9518                | ORF1a    | Nonsynonymous SNV        | C                                     | A        |             | 99.8        |             |             |
| 18093               | ORF1b    | Synonymous SNV           | T                                     | C        | 91.7        |             |             |             |
| 20230               | ORF1b    | Nonsynonymous SNV        | C                                     | T        |             |             | 99.5        |             |
| 22203               | S        | Nonsynonymous SNV        | A                                     | G        |             |             | 99.7        | 99.8        |
| 22298               | S        | Nonsynonymous SNV        | A                                     | C        | 93.1        |             |             |             |
| <b>23594..23623</b> | <b>S</b> | <b>Deletion</b>          | <b>AATTCTCCTCGGCGGGCACGTAGTGTAGCT</b> | -        | <b>99.4</b> |             |             |             |
| <b>23606..23626</b> | <b>S</b> | <b>Deletion</b>          | <b>CGGGCACGTAGTGTAGCTAGT</b>          | -        |             | <b>99.5</b> |             |             |
| <b>23624..23632</b> | <b>S</b> | <b>Deletion</b>          | <b>AGTCAATCC</b>                      | -        |             |             | <b>99.4</b> |             |
| <b>23613</b>        | <b>S</b> | <b>Nonsynonymous SNV</b> | <b>G</b>                              | <b>A</b> |             |             |             | <b>99.7</b> |
| 26963               | M        | Nonsynonymous SNV        | T                                     | G        |             |             | 99.8        | 99.9        |
| 27379..27381        | ORF6     | Nonsynonymous MNV        | GAT                                   | CTC      |             |             |             | 70.5        |

\*Sequence of wk-521 (GenBank accession no. LC522975) is used as a reference
